# Supplementary material for: A big data methodology for categorising technical support requests using Hadoop and Mahout
Source: Springer Nature journal article supplement (doi:10.1186/2196-1115-1-1), 2014-06-24

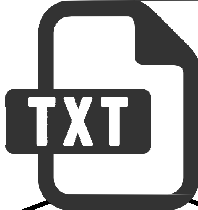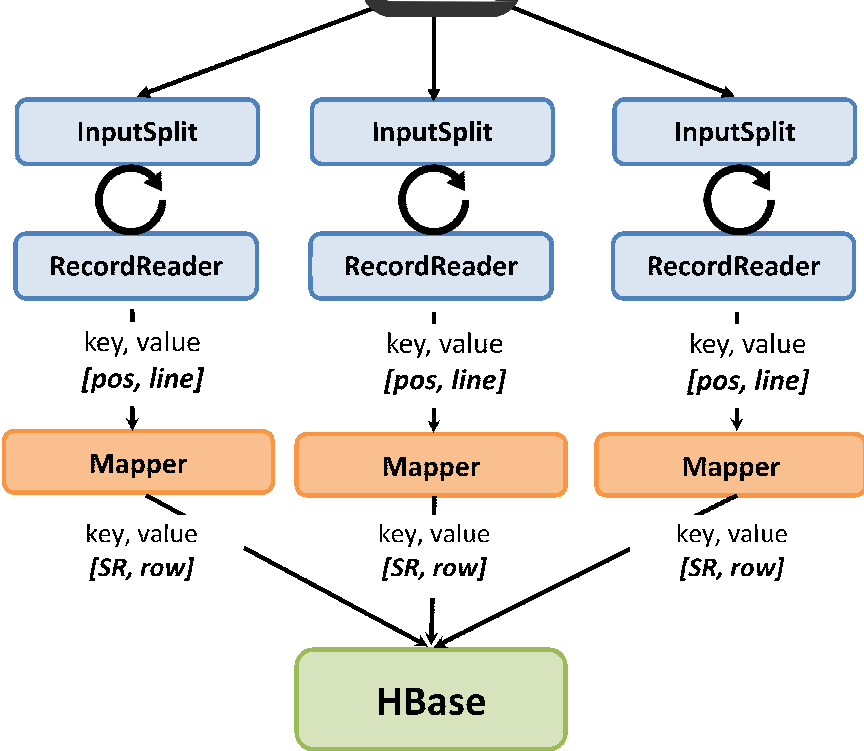

Supplement: 40537_2013_1_MOESM3_ESM.pdf [file 40537_2013_1_MOESM3_ESM.pdf]
